# Supplementary material for: Effects of sequential inhibitory and facilitatory repetitive transcranial magnetic stimulation on neurological and functional recovery of a patient with chronic stroke: A case report and literature review
Source: Frontiers journal article supplement (doi:10.3389/fneur.2023.1064718), 2023-01-27
Supplement: Data_Sheet_1.PDF [file Data_Sheet_1.PDF]

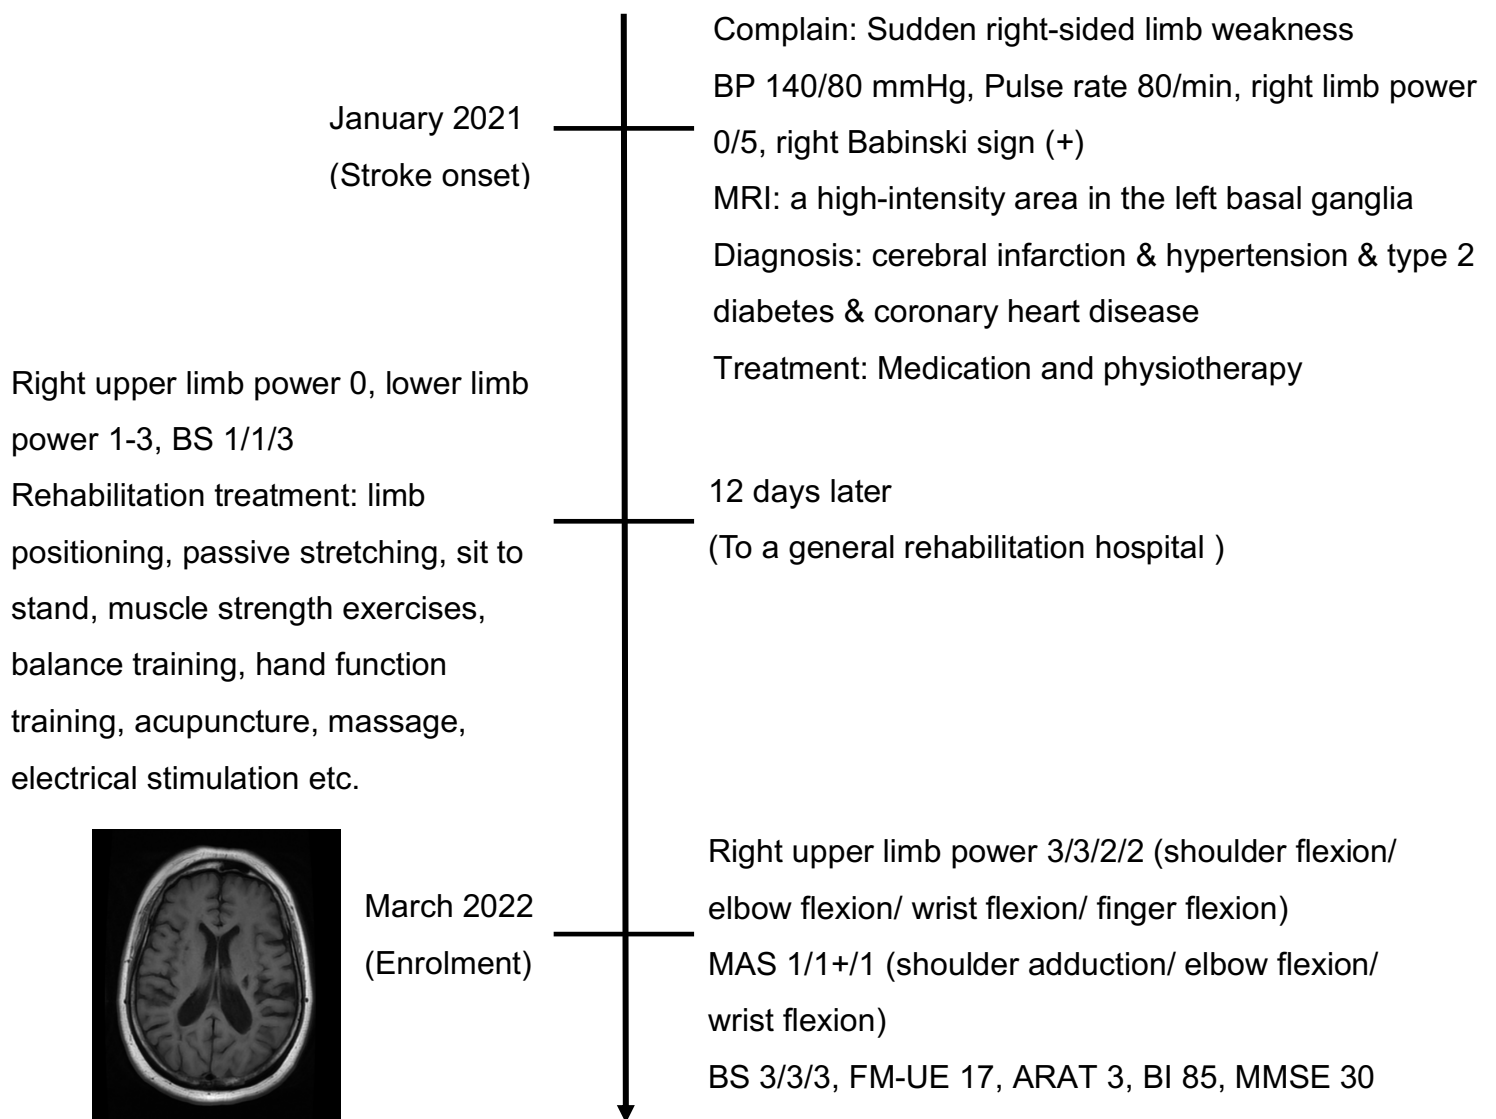

**Figure1.** Timeline with relevant data of the case

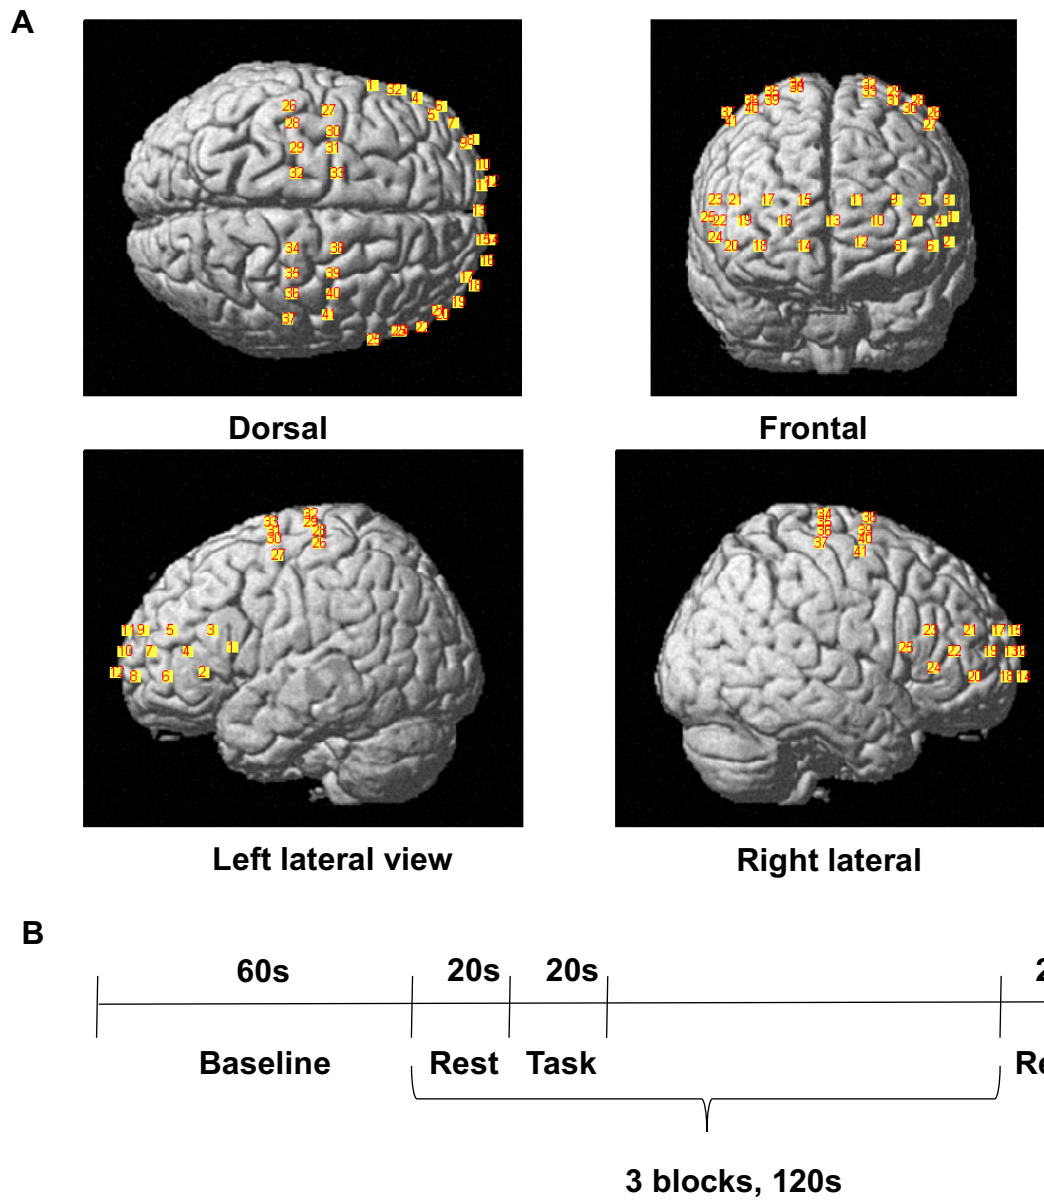

**Figure 1.** (A) fNIRS 41-channel placement. (B) The fNIRS experimental setup.
